# Supplementary material for: The European Prevalence of Resistance Associated Substitutions among Direct Acting Antiviral Failures
Source: MDPI journal article supplement (doi:10.3390/v14010016), 2021-12-22
Supplement: s1 [file s1]

**Table S1: Analysed amino-acid positions for the different hepatitis C geno- and subtype.**

| Amino-acid positions                         |     | Geno-and subtype        |                           |                     |                      |                    |                    |
|----------------------------------------------|-----|-------------------------|---------------------------|---------------------|----------------------|--------------------|--------------------|
| <i>drug class (genome region) / position</i> |     | 1a                      | 1b                        | 2c                  | 3a                   | 4a                 | 4d                 |
| Protease inhibitor (NS3)                     | 36  | V36 <sup>24</sup>       | V36 <sup>24</sup>         | L36 <sup>¥</sup>    |                      |                    |                    |
|                                              | 41  |                         | Q41 <sup>24</sup>         |                     |                      |                    |                    |
|                                              | 43  | F43 <sup>26</sup>       | F43 <sup>24</sup>         |                     |                      |                    |                    |
|                                              | 54  | T54 <sup>24</sup>       | T54 <sup>24</sup>         |                     |                      |                    |                    |
|                                              | 55  |                         | V55 <sup>24</sup>         |                     |                      |                    |                    |
|                                              | 56  | Y56 <sup>24</sup>       | Y56 <sup>24</sup>         | F56 <sup>24</sup>   | Y56 <sup>24</sup>    | Y56 <sup>24</sup>  | Y56 <sup>24</sup>  |
|                                              | 80  | Q80 <sup>24</sup>       | Q80 <sup>24</sup>         |                     | Q80 <sup>26,28</sup> | Q80 <sup>24</sup>  | Q80 <sup>24</sup>  |
|                                              | 122 | S122 <sup>24</sup>      | S122 <sup>24</sup>        |                     |                      |                    |                    |
|                                              | 155 | R155 <sup>24</sup>      | R155 <sup>24</sup>        |                     |                      | R155 <sup>24</sup> | R155 <sup>24</sup> |
|                                              | 156 | A156 <sup>24</sup>      | A156 <sup>24</sup>        | A156 <sup>‡29</sup> | A156 <sup>24</sup>   | A156 <sup>24</sup> | A156 <sup>24</sup> |
|                                              | 158 | V158 <sup>24</sup>      | V158 <sup>24</sup>        |                     |                      |                    |                    |
|                                              | 168 | D168 <sup>24</sup>      | D168 <sup>24</sup>        | D168 <sup>‡29</sup> | Q168 <sup>24</sup>   | D168 <sup>24</sup> | D168 <sup>24</sup> |
|                                              | 170 | I170 <sup>24</sup>      | V170 <sup>24</sup>        |                     |                      |                    |                    |
|                                              | 24  | K24 <sup>24</sup>       |                           |                     |                      |                    |                    |
|                                              | 28  | M28 <sup>24</sup>       | L28 <sup>24</sup>         | F28 <sup>24</sup>   | M28 <sup>24</sup>    | L28 <sup>24</sup>  | L28 <sup>24</sup>  |
|                                              | 30  | Q30 <sup>24</sup>       | R30 <sup>24</sup>         | K30 <sup>24</sup>   | A30 <sup>24</sup>    | L30 <sup>24</sup>  | R30 <sup>24</sup>  |
|                                              | 31  | L31 <sup>24</sup>       | L31 <sup>24</sup>         | L31 <sup>24</sup>   | L31 <sup>24</sup>    | M31 <sup>24</sup>  | M31 <sup>24</sup>  |
|                                              | 32  | P32 <sup>24</sup>       |                           |                     |                      |                    |                    |
|                                              | 38  | S38 <sup>24</sup>       |                           |                     |                      |                    |                    |
| NS5A inhibitors (NS5A)                       | 58  | H58 <sup>24</sup>       | P58 <sup>24</sup>         | P58 <sup>28</sup>   | P58 <sup>30,31</sup> | P58 <sup>24</sup>  | T58 <sup>24</sup>  |
|                                              | 62  |                         | Q/E62D                    |                     | S62L                 | E62                | E62                |
|                                              | 92  | A92 <sup>24</sup>       | A92 <sup>24</sup>         | C92 <sup>24</sup>   | E92 <sup>24</sup>    |                    |                    |
|                                              | 93  | Y93 <sup>24</sup>       | Y93 <sup>24</sup>         | Y93 <sup>24</sup>   | Y93 <sup>24</sup>    | Y93 <sup>24</sup>  | Y93 <sup>24</sup>  |
| Nucleotide analogue (NS5B)                   | 159 | L159 <sup>24</sup>      | L159 <sup>24</sup>        | L159 <sup>24</sup>  | L159 <sup>24</sup>   |                    |                    |
|                                              | 282 | S282 <sup>24</sup>      | S282 <sup>24</sup>        | S282 <sup>24</sup>  | S282 <sup>24</sup>   | S282 <sup>24</sup> | S282 <sup>24</sup> |
|                                              | 316 | C316F/R/Y <sup>24</sup> | C316N/F/H <sup>21</sup>   |                     |                      | *C316Y             |                    |
|                                              | 320 | L320 <sup>24</sup>      |                           |                     |                      |                    |                    |
|                                              | 321 | V321 <sup>24</sup>      |                           |                     | V321 <sup>24</sup>   |                    |                    |
| Non-Nucleoside analogue (NS5B)               | 316 | C316Y <sup>21</sup>     | C316H/N/Y/W <sup>21</sup> |                     |                      |                    |                    |
|                                              | 414 | M414 <sup>24</sup>      | M414 <sup>24</sup>        |                     |                      |                    |                    |
|                                              | 444 | D/N444                  |                           |                     |                      |                    |                    |
|                                              | 448 | Y448 <sup>24</sup>      | Y448 <sup>24</sup>        |                     |                      |                    |                    |
|                                              | 553 | A553 <sup>24</sup>      | A553 <sup>24</sup>        |                     |                      |                    |                    |
|                                              | 554 | G554 <sup>24</sup>      | G554 <sup>24</sup>        |                     |                      |                    |                    |
|                                              | 556 | S556 <sup>24</sup>      | S556 <sup>24</sup>        |                     |                      |                    |                    |

|  |     |                    |                    |
|--|-----|--------------------|--------------------|
|  | 558 | G558 <sup>24</sup> | G558 <sup>24</sup> |
|  | 559 | D559 <sup>24</sup> | D559 <sup>24</sup> |

**Table 1.** Covered amino-acid positions for treatment- emerging RAS per geno-and subtype

¥ Possible treatment emerging mutation found

‡ Positions indicated as clinically relevant in genotype 2a and 2b; unknown for genotype 2c

**Figure S1. Figure distinct RAS pattern after direct-acting antiviral failure per region per Hepatitis C genotype.**

In NS3 there was no data or patients who failed with a GT3a and GT4a HCV infection. In NS5B there was no data of patients who failed with a GT2c HCV infection. In the NS5B region there is a distinction between patients who failed a SOF or DAS containing regimen.

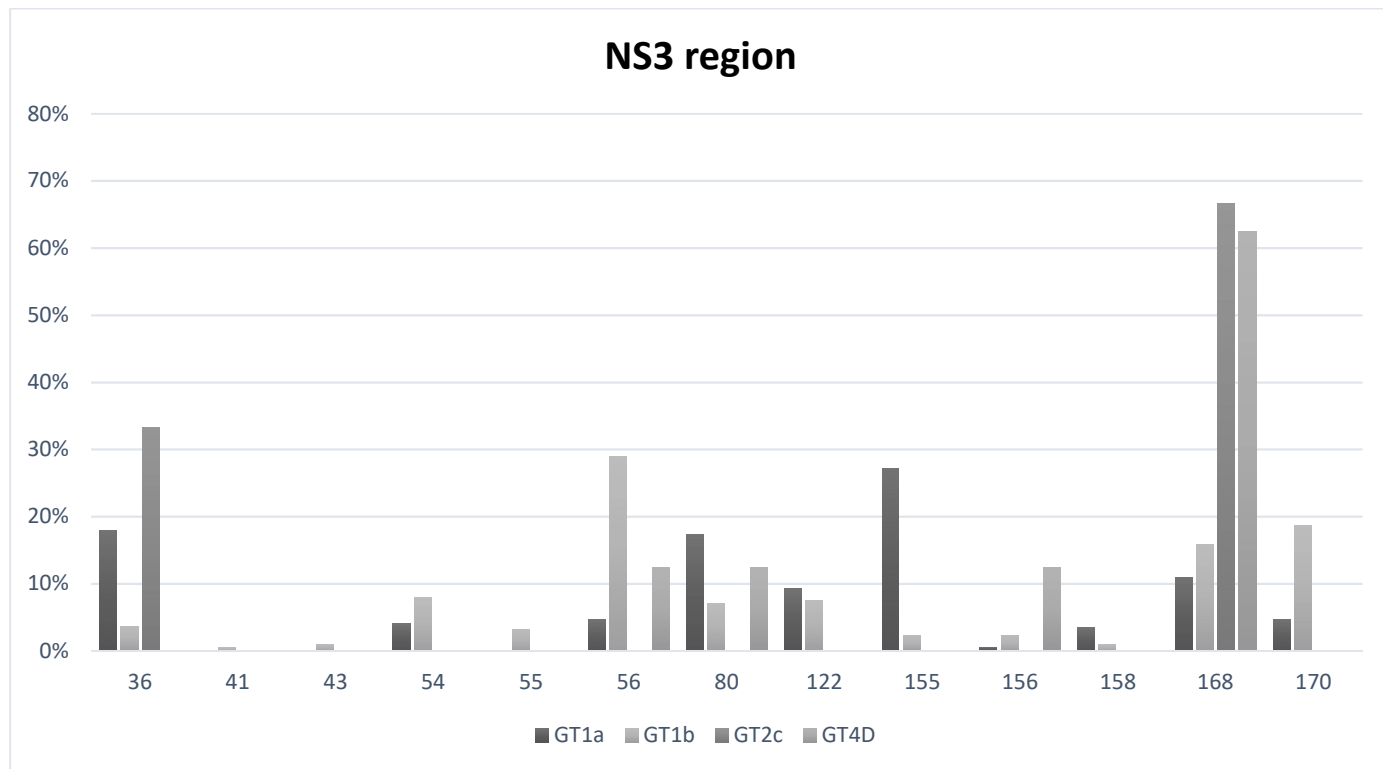

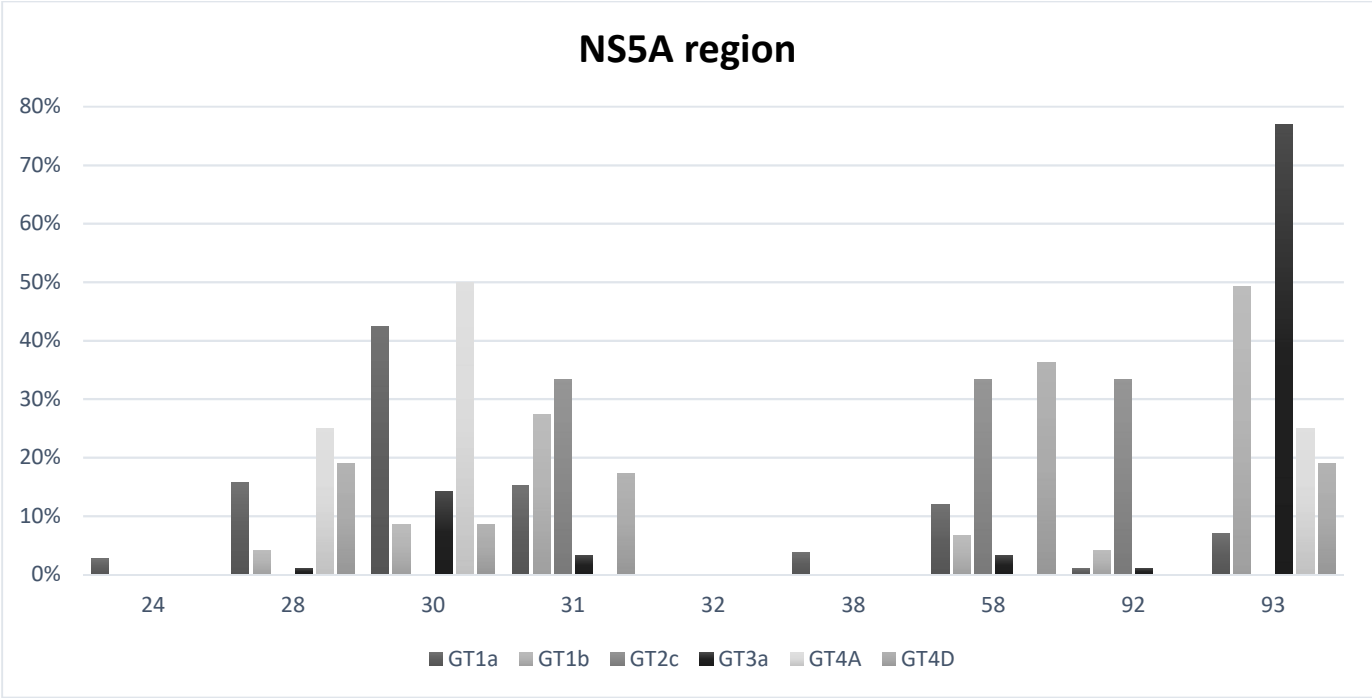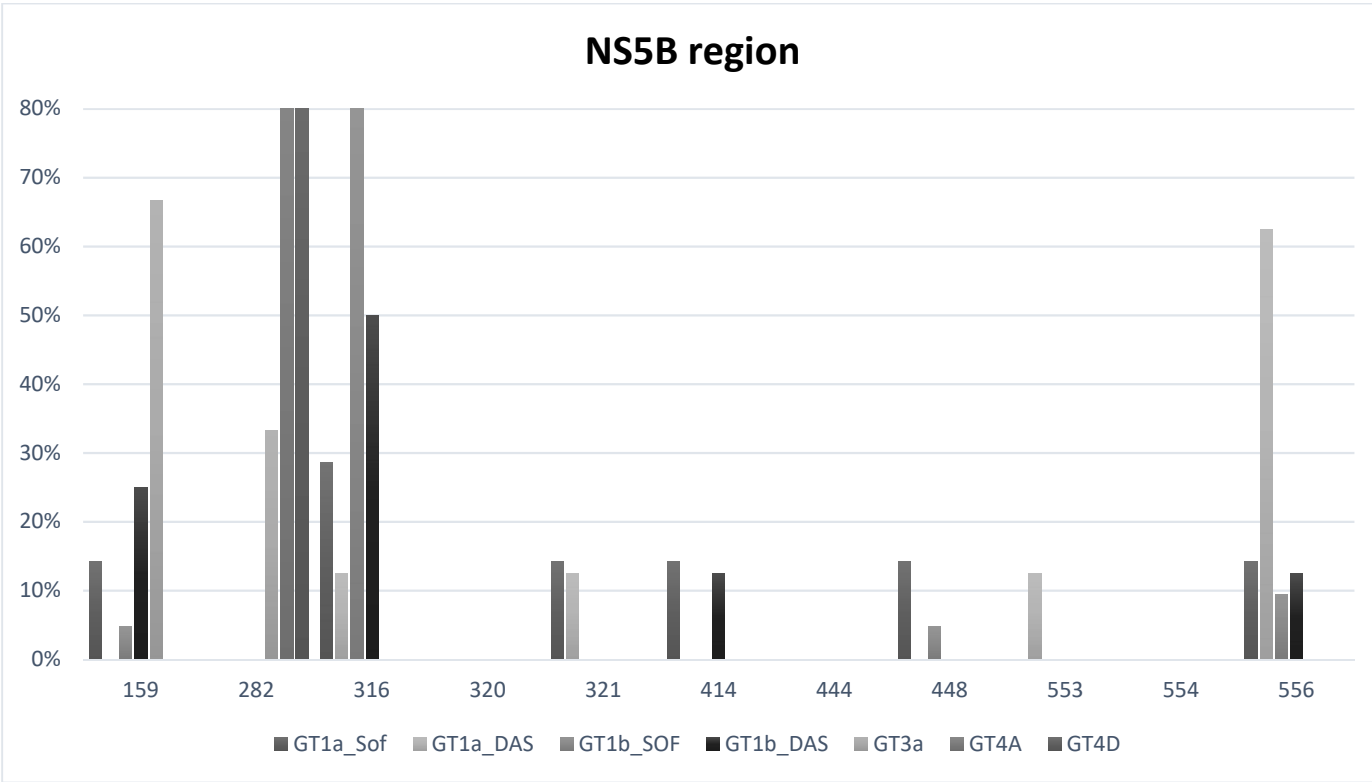

**Table S2. European RAS prevalence after failure specified over different geno-/subtypes.**

| HCV genotype 1a |            |                         |      |
|-----------------|------------|-------------------------|------|
| NS3             | Prevalence | 95% Confidence interval |      |
| V36L            | 5.9        | 2.9                     | 11.6 |
| V36M            | 20.2       | 13.9                    | 28.3 |
| T54A            | 1.7        | 0.5                     | 5.9  |
| T54S            | 4.2        | 1.8                     | 9.5  |
| Y56H            | 5.9        | 2.9                     | 11.6 |
| Y56W            | 0.8        | 0.1                     | 4.6  |
| Q80H            | 0.8        | 0.1                     | 4.6  |
| Q80K            | 20.2       | 13.9                    | 28.3 |
| Q80KN           | 0.8        | 0.1                     | 4.6  |
| Q80L            | 5.0        | 2.3                     | 10.6 |
| S122G           | 11.0       | 6.6                     | 17.9 |
| S122I           | 0.8        | 0.1                     | 4.6  |
| S122N           | 1.7        | 0.5                     | 6.0  |
| R155I           | 0.8        | 0.1                     | 4.6  |
| R155K           | 37.3       | 29.1                    | 46.3 |
| R155KT          | 0.8        | 0.1                     | 4.6  |
| R155T           | 1.7        | 0.5                     | 6.0  |
| A156V           | 0.9        | 0.2                     | 4.7  |
| V158G           | 0.9        | 0.2                     | 4.7  |
| V158I           | 1.7        | 0.5                     | 6.1  |
| V158M           | 1.7        | 0.5                     | 6.1  |
| V158L           | 0.9        | 0.2                     | 4.7  |
| D168A           | 5.7        | 2.6                     | 11.8 |
| D168AV          | 0.9        | 0.2                     | 5.2  |
| D168E           | 3.8        | 1.5                     | 9.3  |
| D168V           | 4.7        | 2.0                     | 10.6 |
| D168Y           | 1.9        | 0.5                     | 6.6  |
| I170T           | 1.9        | 0.5                     | 6.7  |
| I170V           | 5.7        | 2.6                     | 11.9 |
|                 |            |                         |      |
| NS5A            | Prevalence | 95% Confidence interval |      |
| K24E            | 0.6        | 0.1                     | 3.6  |
| K24Q            | 0.6        | 0.1                     | 3.6  |
| K24R            | 1.3        | 0.4                     | 4.6  |
| K24S            | 0.6        | 0.1                     | 3.6  |
| M28L            | 0.6        | 0.1                     | 3.5  |
| M28T            | 10.0       | 6.2                     | 15.6 |
| M28PT           | 0.6        | 0.1                     | 3.5  |
| M28V            | 7.5        | 4.3                     | 12.7 |
| Q30A            | 0.6        | 0.1                     | 3.5  |
| Q30D            | 0.6        | 0.1                     | 3.5  |
| Q30E            | 3.1        | 1.3                     | 7.1  |

|             |                   |                                |      |
|-------------|-------------------|--------------------------------|------|
| Q30H        | 6.9               | 3.9                            | 11.9 |
| Q30HR       | 0.6               | 0.1                            | 3.5  |
| Q30K        | 1.9               | 0.6                            | 5.4  |
| Q30L        | 1.3               | 0.3                            | 4.4  |
| Q30R        | 34.4              | 27.5                           | 42.0 |
| L31C        | 0.6               | 0.1                            | 3.4  |
| L31F        | 0.6               | 0.1                            | 3.4  |
| L31M        | 14.9              | 10.2                           | 21.2 |
| L31V        | 1.9               | 0.6                            | 5.3  |
| S38APT      | 0.6               | 0.1                            | 3.4  |
| S38F        | 1.2               | 0.3                            | 4.3  |
| S38H        | 0.6               | 0.1                            | 3.4  |
| S38P        | 0.6               | 0.1                            | 3.4  |
| S38Y        | 0.6               | 0.1                            | 3.4  |
| S38W        | 0.6               | 0.1                            | 3.4  |
| H58C        | 0.6               | 0.1                            | 3.4  |
| H58D        | 3.1               | 1.3                            | 7.0  |
| H58G        | 0.6               | 0.1                            | 3.4  |
| H58QR       | 0.6               | 0.1                            | 3.4  |
| H58N        | 0.6               | 0.1                            | 3.4  |
| H58P        | 6.8               | 3.8                            | 11.7 |
| H58Y        | 1.2               | 0.3                            | 4.4  |
| A92P        | 0.6               | 0.1                            | 3.5  |
| A92T        | 0.6               | 0.1                            | 3.5  |
| Y93C        | 1.3               | 0.4                            | 4.6  |
| Y93H        | 7.1               | 4.0                            | 12.2 |
| Y93N        | 0.6               | 0.1                            | 3.5  |
|             |                   |                                |      |
| <b>NS5B</b> | <b>Prevalence</b> | <b>95% Confidence interval</b> |      |
| L159F       | 2.9               | 0.5                            | 14.9 |
| S282T       | 1.4               | 0.3                            | 7.7  |
| C316N*      | 1.4               | 0.2                            | 7.6  |
| C316R*      | 1.4               | 0.2                            | 7.6  |
| C316Y*      | 1.4               | 0.2                            | 7.6  |
| C316Y**     | 10.0              | 2.8                            | 30.1 |
| V321F       | 1.4               | 0.2                            | 7.6  |
| A553T       | 9.1               | 1.6                            | 37.7 |
| S556G       | 45.5              | 21.3                           | 72.0 |

\*Sofosbuvir; \*\*Dasabuvir

| HCV genotype 1b |            |                         |     |
|-----------------|------------|-------------------------|-----|
| NS3             | Prevalence | 95% Confidence interval |     |
| V36A            | 1.1        | 0.3                     | 3.8 |
| V36C            | 0.5        | 0.1                     | 3.0 |
| V36L            | 0.5        | 0.1                     | 3.0 |
| V36M            | 1.1        | 0.3                     | 3.8 |
| F43S            | 0.5        | 0.1                     | 3.0 |
| T54A            | 4.8        | 2.5                     | 8.8 |

|               |                   |                                |      |
|---------------|-------------------|--------------------------------|------|
| <i>T54S</i>   | 4.8               | 2.5                            | 8.8  |
| <i>V55A</i>   | 1.1               | 0.3                            | 3.8  |
| <i>V55F</i>   | 0.5               | 0.1                            | 2.9  |
| <i>Y56F</i>   | 29.1              | 23.1                           | 35.9 |
| <i>Y56H</i>   | 6.3               | 3.7                            | 10.8 |
| <i>Q80K</i>   | 0.5               | 0.1                            | 2.9  |
| <i>Q80L</i>   | 2.1               | 0.8                            | 5.3  |
| <i>Q80R</i>   | 3.2               | 1.5                            | 6.8  |
| <i>S122N</i>  | 1.7               | 0.6                            | 4.8  |
| <i>S122R</i>  | 0.6               | 0.1                            | 3.1  |
| <i>S122T</i>  | 7.3               | 4.3                            | 12.1 |
| <i>R155A</i>  | 0.6               | 0.1                            | 3.1  |
| <i>R155G</i>  | 0.6               | 0.1                            | 3.1  |
| <i>R155Q</i>  | 1.7               | 0.6                            | 4.8  |
| <i>R155W</i>  | 0.6               | 0.1                            | 3.1  |
| <i>A156G</i>  | 0.6               | 0.1                            | 3.1  |
| <i>A156S</i>  | 1.1               | 0.3                            | 4.0  |
| <i>A156T</i>  | 1.7               | 0.6                            | 4.8  |
| <i>A156V</i>  | 0.6               | 0.1                            | 3.1  |
| <i>V158I</i>  | 0.6               | 0.1                            | 3.1  |
| <i>D168A</i>  | 3.4               | 1.6                            | 7.3  |
| <i>D168E</i>  | 6.3               | 3.6                            | 11.0 |
| <i>D168H</i>  | 0.6               | 0.1                            | 3.2  |
| <i>D168N</i>  | 0.6               | 0.1                            | 3.2  |
| <i>D168V</i>  | 14.4              | 9.9                            | 20.3 |
| <i>V170A</i>  | 2.8               | 1.1                            | 7.0  |
| <i>V170I</i>  | 23.1              | 16.9                           | 30.6 |
| <i>V170T</i>  | 0.7               | 0.1                            | 3.9  |
|               |                   |                                |      |
| <b>NS5A</b>   | <b>Prevalence</b> | <b>95% Confidence interval</b> |      |
| <i>L28G</i>   | 0.8               | 0.1                            | 4.2  |
| <i>L28M</i>   | 4.6               | 2.1                            | 9.6  |
| <i>L28V</i>   | 0.8               | 0.1                            | 4.2  |
| <i>R30AGP</i> | 0.8               | 0.1                            | 4.1  |
| <i>R30K</i>   | 0.8               | 0.1                            | 4.1  |
| <i>R30Q</i>   | 12.0              | 7.5                            | 18.6 |
| <i>L31EV</i>  | 0.7               | 0.1                            | 4.1  |
| <i>L31F</i>   | 0.7               | 0.1                            | 4.1  |
| <i>L31I</i>   | 6.0               | 3.1                            | 11.3 |
| <i>L31IM</i>  | 0.7               | 0.1                            | 4.1  |
| <i>L31M</i>   | 29.1              | 22.1                           | 37.3 |
| <i>L31V</i>   | 6.0               | 3.1                            | 11.3 |
| <i>P58A</i>   | 1.4               | 0.4                            | 5.0  |
| <i>P58S</i>   | 4.9               | 2.4                            | 9.8  |
| <i>P58T</i>   | 2.1               | 0.7                            | 6.0  |
| <i>A92E</i>   | 0.7               | 0.1                            | 3.9  |
| <i>A92K</i>   | 0.7               | 0.1                            | 3.9  |
| <i>A92T</i>   | 0.7               | 0.1                            | 3.9  |

|                |                   |                                |      |
|----------------|-------------------|--------------------------------|------|
| <i>A92V</i>    | 3.5               | 1.5                            | 8.0  |
| <i>Y93C</i>    | 0.7               | 0.1                            | 3.9  |
| <i>Y93H</i>    | 73.2              | 65.4                           | 79.8 |
|                |                   |                                |      |
| <b>NS5B</b>    | <b>Prevalence</b> | <b>95% Confidence interval</b> |      |
| <i>L159F</i>   | 43.8              | 33.0                           | 55.2 |
| <i>S282</i>    | 0.0               | 0.0                            | 3.6  |
| <i>C316N*</i>  | 60.8              | 51.1                           | 69.7 |
| <i>C316N**</i> | 56.3              | 33.2                           | 76.9 |
| <i>C316H</i>   | 6.3               | 1.1                            | 28.3 |
| <i>M414I</i>   | 9.1               | 1.6                            | 37.7 |
| <i>G556S</i>   | 44.4              | 18.9                           | 73.3 |

\*Sofosbuvir; \*\*Dasabuvir

| HCV genotype 2c |                   |                                |       |
|-----------------|-------------------|--------------------------------|-------|
| <b>NS3</b>      | <b>Prevalence</b> | <b>95% Confidence interval</b> |       |
| <i>L36V</i>     | 33.3              | 6.1                            | 79.2  |
| <i>V158M</i>    | 33.3              | 6.1                            | 79.2  |
| <i>D168V</i>    | 100               | 34.2                           | 100.0 |
|                 |                   |                                |       |
| <b>NS5A</b>     | <b>Prevalence</b> | <b>95% Confidence interval</b> |       |
| <i>F28C</i>     | 100               | 51.0                           | 100.0 |
| <i>L31M</i>     | 25                | 4.6                            | 69.9  |
| <i>P58S</i>     | 25                | 4.6                            | 69.9  |
| <i>C92S</i>     | 25                | 4.6                            | 69.9  |

There were no NS5B failures or NS5B sequences available in our cohort of GT2c failures

| HCV genotype 3a |                   |                                |      |
|-----------------|-------------------|--------------------------------|------|
| <b>NS5A</b>     | <b>Prevalence</b> | <b>95% Confidence interval</b> |      |
| <i>M28L</i>     | 0.6               | 0.1                            | 3.2  |
| <i>A30K</i>     | 14.9              | 10.3                           | 20.9 |
| <i>A30S</i>     | 5.1               | 2.7                            | 9.5  |
| <i>A30T</i>     | 0.6               | 0.1                            | 3.2  |
| <i>A30V</i>     | 1.1               | 0.3                            | 4.1  |
| <i>L31F</i>     | 0.6               | 0.1                            | 3.1  |
| <i>L31I</i>     | 1.7               | 0.6                            | 4.9  |
| <i>L31M</i>     | 0.6               | 0.1                            | 3.1  |
| <i>P58A</i>     | 1.1               | 0.3                            | 4.1  |
| <i>P58R</i>     | 0.6               | 0.1                            | 3.2  |
| <i>P58S</i>     | 2.3               | 0.9                            | 5.7  |
| <i>P58T</i>     | 1.1               | 0.3                            | 4.1  |
| <i>E92A</i>     | 0.6               | 0.1                            | 3.2  |
| <i>E92del</i>   | 0.6               | 0.1                            | 3.2  |
| <i>Y93H</i>     | 57.1              | 49.7                           | 64.2 |
| <i>Y93N</i>     | 0.6               | 0.1                            | 3.2  |
|                 |                   |                                |      |
| <b>NS5B</b>     | <b>Prevalence</b> | <b>95% Confidence interval</b> |      |
| <i>L159F</i>    | 2.8               | 1.0                            | 8.0  |



|               |     |     |     |
|---------------|-----|-----|-----|
| <i>L159H</i>  | 0.9 | 0.2 | 5.2 |
| <i>E237G</i>  | 0.9 | 0.2 | 4.9 |
| <i>S282GR</i> | 0.8 | 0.1 | 4.4 |
| <i>S282T</i>  | 0.8 | 0.1 | 4.4 |
| <i>C316A*</i> | 0.8 | 0.1 | 4.3 |
| <i>V321A</i>  | 0.8 | 0.1 | 4.3 |

\*Sofosbuvir. There were no NS3 failures or NS3 sequences available in our cohort of GT3a failures. No RAS were detected at position 321 of GT3a DAS failures

| HCV genotype 4a |            |                         |      |
|-----------------|------------|-------------------------|------|
| NS3             | Prevalence | 95% Confidence interval |      |
| <i>Q80R</i>     | 1          | 20.7                    | 100  |
| NS5A            | Prevalence | 95% Confidence interval |      |
| <i>L28M</i>     | 25.0       | 8.9                     | 53.2 |
| <i>L28V</i>     | 33.3       | 13.8                    | 60.9 |
| <i>R30F</i>     | 8.3        | 1.5                     | 35.4 |
| <i>R30H</i>     | 25.0       | 8.9                     | 53.2 |
| <i>R30L</i>     | 41.7       | 19.3                    | 68.0 |
| <i>P58T</i>     | 8.3        | 1.5                     | 35.4 |
| <i>E62Q</i>     | 9.1        | 1.6                     | 37.7 |
| <i>Y93H</i>     | 8.3        | 1.5                     | 35.4 |
| NS5B            | Prevalence | 95% Confidence interval |      |
| <i>S282T</i>    | 33.33      | 12.1                    | 64.6 |
| HCV genotype 4d |            |                         |      |
| NS3             | Prevalence | 95% Confidence interval |      |
| <i>Y56H</i>     | 4.2        | 0.7                     | 20.2 |
| <i>A156G</i>    | 5.6        | 1.0                     | 25.8 |
| <i>D168A</i>    | 11.1       | 3.1                     | 32.8 |
| <i>D168E</i>    | 16.7       | 5.8                     | 39.2 |
| <i>D168V</i>    | 5.6        | 1.0                     | 25.8 |
| NS5A            | Prevalence | 95% Confidence interval |      |
| <i>L28ALSV</i>  | 2.1        | 0.4                     | 11.1 |
| <i>L28M</i>     | 6.4        | 2.2                     | 17.2 |
| <i>L28S</i>     | 2.1        | 0.4                     | 11.1 |
| <i>L28V</i>     | 12.8       | 6.0                     | 25.2 |
| <i>R30C</i>     | 2.1        | 0.4                     | 11.1 |
| <i>R30H</i>     | 2.1        | 0.4                     | 11.1 |
| <i>R30S</i>     | 2.1        | 0.4                     | 11.1 |
| <i>M31I</i>     | 2.1        | 0.4                     | 11.1 |
| <i>M31V</i>     | 17.0       | 8.9                     | 30.1 |
| <i>T58A</i>     | 6.4        | 2.2                     | 17.2 |
| <i>T58L</i>     | 2.1        | 0.4                     | 11.1 |
| <i>T58LP</i>    | 2.1        | 0.4                     | 11.1 |
| <i>T58P</i>     | 57.4       | 43.3                    | 70.5 |

|               |                   |                                |      |
|---------------|-------------------|--------------------------------|------|
| <i>T58PS</i>  | 2.1               | 0.4                            | 11.1 |
| <i>E62M</i>   | 2.2               | 0.4                            | 11.6 |
| <i>E62Q</i>   | 2.2               | 0.4                            | 11.6 |
| <i>Y93C</i>   | 8.7               | 3.4                            | 20.3 |
| <i>Y93CS</i>  | 2.2               | 0.4                            | 11.3 |
| <i>Y93H</i>   | 8.7               | 3.4                            | 20.3 |
|               |                   |                                |      |
| <b>NS5B</b>   | <b>Prevalence</b> | <b>95% Confidence interval</b> |      |
| <i>S282CT</i> | 8.7               | 2.4                            | 26.8 |
| <i>S282T</i>  | 4.3               | 0.8                            | 21.0 |

**Table S3. European prevalence of NS5A RAS patterns.**

| <b>HCV genotype 1a</b>     | <b>Prevalence</b> | <b>95% Confidence interval</b> |     |
|----------------------------|-------------------|--------------------------------|-----|
| <i>H58P+A92AP</i>          | 0,6               | 0,1                            | 3,6 |
| <i>K24Q+M28L+H58P+Y93H</i> | 0,6               | 0,1                            | 3,6 |
| <i>K24R+Q30H</i>           | 0,6               | 0,1                            | 3,6 |
| <i>K24R+Q30R</i>           | 0,6               | 0,1                            | 3,6 |
| <i>K24S+Q30R+Y93H</i>      | 0,6               | 0,1                            | 3,6 |
| <i>L31F+H58N</i>           | 0,6               | 0,1                            | 3,6 |
| <i>L31M+H58P</i>           | 1,9               | 0,7                            | 5,5 |
| <i>L31V+H58P</i>           | 0,6               | 0,1                            | 3,6 |
| <i>M28MT+Q30QR</i>         | 0,6               | 0,1                            | 3,6 |
| <i>M28MT+Q30QR+H58Y</i>    | 0,6               | 0,1                            | 3,6 |
| <i>M28MT+Q30R+H58P</i>     | 0,6               | 0,1                            | 3,6 |
| <i>M28MV+Q30R</i>          | 0,6               | 0,1                            | 3,6 |
| <i>M28MV+S38APST</i>       | 0,6               | 0,1                            | 3,6 |
| <i>M28T+H58P+S38F</i>      | 0,6               | 0,1                            | 3,6 |
| <i>M28T+Q30R</i>           | 1,9               | 0,7                            | 5,5 |
| <i>M28V+L31M</i>           | 0,6               | 0,1                            | 3,6 |
| <i>M28V+Q30R</i>           | 1,9               | 0,7                            | 5,5 |
| <i>M28V+Q30R+S38SY</i>     | 0,6               | 0,1                            | 3,6 |
| <i>Q30E+L31C</i>           | 0,6               | 0,1                            | 3,6 |
| <i>Q30E+S38W</i>           | 0,6               | 0,1                            | 3,6 |
| <i>Q30H+H58C+Y93H</i>      | 0,6               | 0,1                            | 3,6 |
| <i>Q30H+H58HQR+Y93H</i>    | 0,6               | 0,1                            | 3,6 |
| <i>Q30H+H58Y</i>           | 0,6               | 0,1                            | 3,6 |
| <i>Q30H+Y93H</i>           | 0,6               | 0,1                            | 3,6 |
| <i>Q30KQ+A92AT+Y93HY</i>   | 0,6               | 0,1                            | 3,6 |
| <i>Q30R+H58D</i>           | 1,9               | 0,7                            | 5,5 |
| <i>Q30R+L31LM+H58DH</i>    | 0,6               | 0,1                            | 3,6 |
| <i>Q30R+L31M</i>           | 2,6               | 1,0                            | 6,4 |
| <i>Q30R+L31V</i>           | 0,6               | 0,1                            | 3,6 |
| <i>Q30R+S38FS</i>          | 0,6               | 0,1                            | 3,6 |
| <i>Q30R+S38P</i>           | 0,6               | 0,1                            | 3,6 |

| <b>HCV genotype 1b</b>     | <b>Prevalence</b> | <b>95% Confidence interval</b> |      |
|----------------------------|-------------------|--------------------------------|------|
| L31M+Y93H                  | 16,0              | 10,1                           | 23,9 |
| L28M+Y93H                  | 3,1               | 1,0                            | 7,8  |
| P58PS+Y93H                 | 3,1               | 1,0                            | 7,8  |
| R30Q+Y93H                  | 3,1               | 1,0                            | 7,8  |
| A92V+Y93H                  | 2,3               | 0,6                            | 6,7  |
| L31I+Y93H                  | 2,3               | 0,6                            | 6,7  |
| L31V+Y93H                  | 3,1               | 1,0                            | 7,8  |
| R30Q+L31M+Y93H             | 2,3               | 0,6                            | 6,7  |
| R30Q+L31I+Y93H             | 1,5               | 0,3                            | 5,5  |
| L28G+L31I                  | 0,8               | 0,0                            | 4,3  |
| L28M+R30AGP+L31F+A92E+Y93H | 0,8               | 0,0                            | 4,3  |
| L28M+L31M+Y93H             | 0,8               | 0,0                            | 4,3  |
| L28V+Y93H                  | 0,8               | 0,0                            | 4,3  |
| L31EV+Y93H                 | 0,8               | 0,0                            | 4,3  |
| L31I+A92T+Y93H             | 0,8               | 0,0                            | 4,3  |
| L31IM+Y93H                 | 0,8               | 0,0                            | 4,3  |
| L31LV+Y93HY                | 0,8               | 0,0                            | 4,3  |
| L31M+A92V+Y93H             | 0,8               | 0,0                            | 4,3  |
| L31M+P58S+Y93C             | 0,8               | 0,0                            | 4,3  |
| L31V+P58T+Y93H             | 0,8               | 0,0                            | 4,3  |
| P58A+Y93H                  | 0,8               | 0,0                            | 4,3  |
| P58T+Y93H                  | 0,8               | 0,0                            | 4,3  |
| R30K+P58A+Y93H             | 0,8               | 0,0                            | 4,3  |
| R30Q+L31M                  | 0,8               | 0,0                            | 4,3  |
| R30Q+L31M+P58S+Y93H        | 0,8               | 0,0                            | 4,3  |
| R30Q+L31V+Y93H             | 0,8               | 0,0                            | 4,3  |
| R30Q+P58S+Y93H             | 0,8               | 0,0                            | 4,3  |
| R30Q+A92K                  | 0,8               | 0,0                            | 4,3  |
| Q30R+L31M                  | 3,1               | 1,0                            | 7,8  |
| L31M+H58P                  | 2,3               | 0,6                            | 6,7  |
| M28T+Q30R                  | 2,3               | 0,6                            | 6,7  |
| M28V+Q30R                  | 2,3               | 0,6                            | 6,7  |
| Q30R+H58D                  | 2,3               | 0,6                            | 6,7  |
| H58P+A92AP                 | 0,8               | 0,0                            | 4,3  |
| K24Q+M28L+H58P+Y93H        | 0,8               | 0,0                            | 4,3  |
| K24R+Q30H                  | 0,8               | 0,0                            | 4,3  |
| K24R+Q30R                  | 0,8               | 0,0                            | 4,3  |
| K24S+Q30R+Y93H             | 0,8               | 0,0                            | 4,3  |
| L31F+H58N                  | 0,8               | 0,0                            | 4,3  |
| L31V+H58P                  | 0,8               | 0,0                            | 4,3  |
| M28MT+Q30QR                | 0,8               | 0,0                            | 4,3  |
| M28MT+Q30QR+H58Y           | 0,8               | 0,0                            | 4,3  |
| M28MT+Q30R+H58P            | 0,8               | 0,0                            | 4,3  |
| M28MV+Q30R                 | 0,8               | 0,0                            | 4,3  |
| M28MV+S38APST              | 0,8               | 0,0                            | 4,3  |

|                        |                   |                                |      |
|------------------------|-------------------|--------------------------------|------|
| M28T+H58P+S38F         | 0,8               | 0,0                            | 4,3  |
| M28V+L31M              | 0,8               | 0,0                            | 4,3  |
| M28V+Q30R+S38SY        | 0,8               | 0,0                            | 4,3  |
| Q30E+L31C              | 0,8               | 0,0                            | 4,3  |
| Q30E+S38W              | 0,8               | 0,0                            | 4,3  |
| Q30H+H58C+Y93H         | 0,8               | 0,0                            | 4,3  |
| Q30H+H58HQR+Y93H       | 0,8               | 0,0                            | 4,3  |
| Q30H+H58Y              | 0,8               | 0,0                            | 4,3  |
| Q30H+Y93H              | 0,8               | 0,0                            | 4,3  |
| Q30KQ+A92AT+Y93HY      | 0,8               | 0,0                            | 4,3  |
| Q30R+L31LM+H58DH       | 0,8               | 0,0                            | 4,3  |
| Q30R+L31V              | 0,8               | 0,0                            | 4,3  |
| Q30R+S38FS             | 0,8               | 0,0                            | 4,3  |
| Q30R+S38P              | 0,8               | 0,0                            | 4,3  |
| <b>HCV genotype 2c</b> | <b>Prevalence</b> | <b>95% Confidence interval</b> |      |
| F28C+P58S              | 25,0              | 4,6                            | 69,9 |
| F28C+C92S              | 25,0              | 4,6                            | 69,9 |
| F28C+L31M              | 25,0              | 4,6                            | 69,9 |
| <b>HCV genotype 3a</b> | <b>Prevalence</b> | <b>95% Confidence interval</b> |      |
| A30T+Y93H              | 0,9               | 0,2                            | 5,2  |
| M28L+A30S+Y93H         | 0,9               | 0,2                            | 5,2  |
| P58S+Y93H              | 0,9               | 0,2                            | 5,2  |
| L31I+Y93H              | 0,9               | 0,2                            | 5,2  |
| A30S+Y93H              | 0,9               | 0,2                            | 5,2  |
| A30K+E92A              | 0,9               | 0,2                            | 5,2  |
| A30V+Y93H              | 0,9               | 0,2                            | 5,2  |
| A30K+Y93H              | 1,9               | 0,5                            | 6,6  |
| P58R+Y93H              | 0,9               | 0,2                            | 5,2  |
| <b>HCV genotype 4a</b> | <b>Prevalence</b> | <b>95% Confidence interval</b> |      |
| L28M+L30R              | 25,0              | 4,6                            | 69,9 |
| <b>HCV genotype 4d</b> | <b>Prevalence</b> | <b>95% Confidence interval</b> |      |
| L28LV+R30H             | 2,2               | 1,9                            | 9,8  |
| M31V+T58P              | 6,5               | 5,9                            | 13,9 |
| M31V+T58A              | 2,2               | 1,9                            | 9,8  |
| T58P+Y93CS             | 2,2               | 1,9                            | 9,8  |
| T58P+Y93C              | 2,2               | 1,9                            | 9,8  |
| R30C+Y93H              | 2,2               | 1,9                            | 9,8  |
| T58P+Y93H              | 4,3               | 3,8                            | 11,9 |
| L28M+T58P              | 6,5               | 5,9                            | 13,9 |
| R30H+T58A              | 2,2               | 1,9                            | 9,8  |
| T58P+Y93CY             | 2,2               | 1,9                            | 9,8  |
| T58A+Y93C              | 2,2               | 1,9                            | 9,8  |
| M31V+Y93H              | 2,2               | 1,9                            | 9,8  |
| L28M+T58H              | 2,2               | 1,9                            | 9,8  |
| L28V+R30S+T58P         | 2,2               | 1,9                            | 9,8  |
| L28ALSV+M31MV+T58P     | 2,2               | 1,9                            | 9,8  |

|                        |            |            |            |
|------------------------|------------|------------|------------|
| <i>L28S+T58P+Y93C</i>  | <i>2,2</i> | <i>1,9</i> | <i>9,8</i> |
| <i>L28V+M31IM+T58L</i> | <i>2,2</i> | <i>1,9</i> | <i>9,8</i> |
